# Supplementary material for: Extracellular DNA Correlates with Intestinal Inflammation in Chemically Induced Colitis in Mice
Source: PubMed Central journal article supplement (PMC7825321; doi:10.3390/cells10010081), 2021-01-06
Supplement: cells-10-00081-s001.pdf [file cells-10-00081-s001.pdf]

## Supplementary Material

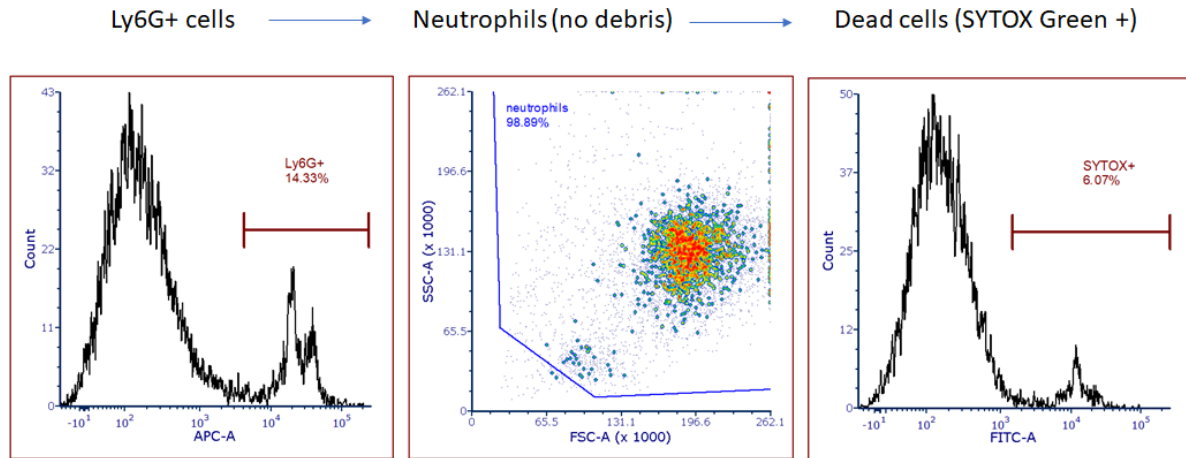

**Figure S1.** Representative plots of cell sorting.

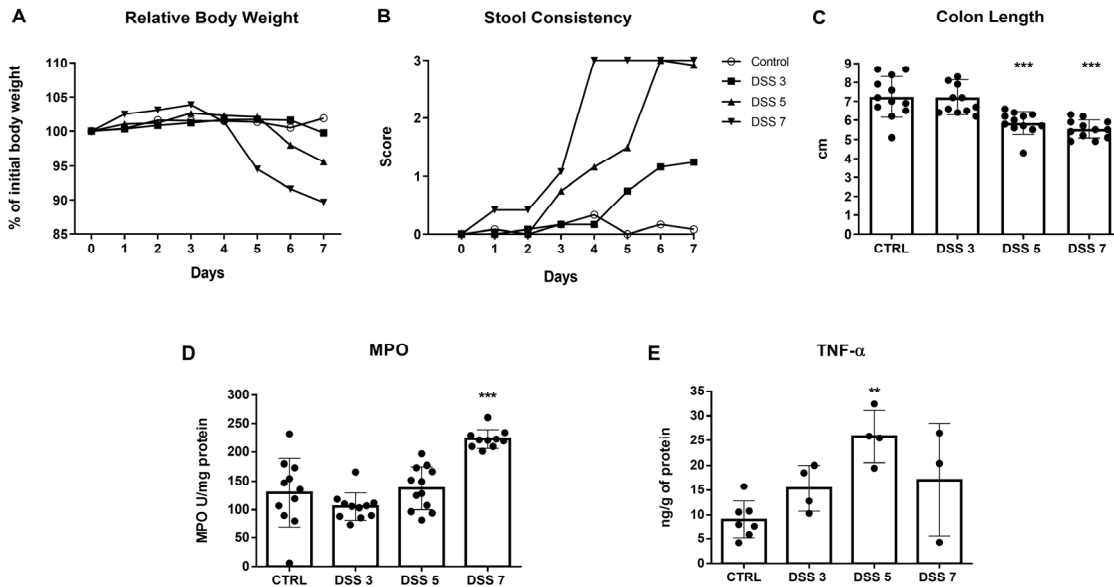

**Figure S2.** Markers of disease activity (A) ingestion of 3% dextran sulfate sodium (DSS) decreased relative body weight of all experimental groups from day 3. (B) higher stool consistency score of all experimental groups confirmed extensive intestinal inflammation compared to control group. (C) colon length of DSS 5 and DSS 7 groups was significantly shorter compared to control group. (D) MPO activity was significantly higher in DSS 7 group compared to control group. (E) TNF- $\alpha$  showed a rising trend up to day 5 reaching statistical significance and decreased on day 7. \*\* =  $0.05 > p > 0.01$ ; \*\*\* =  $p < 0.001$ .

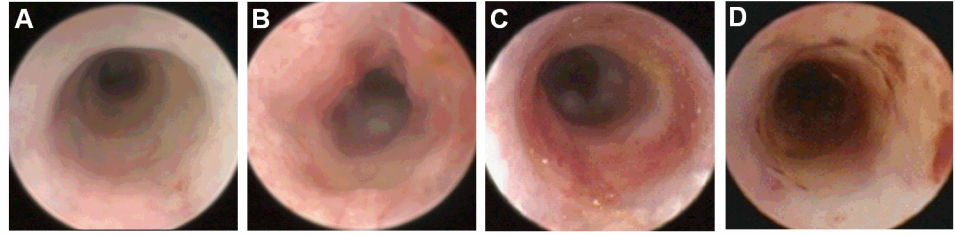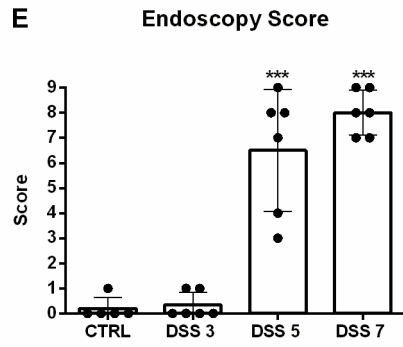

**Figure S3.** Representative images of endoscopic examination of (A) control group, (B) DSS 3, (C) DSS 5 and (D) DSS 7. (E) endoscopy score confirmed significant intestinal inflammation in DSS 5 and DSS 7 groups. [M1] \*\*\* =  $p < 0.001$ .
